# Supplementary material
Source: HighWire-hosted journal article supplement (https://www.qdcxjkg.com/highwire/filestream/114341/field_highwire_adjunct_files/0/ERJ-01020-2013_Disclosures.pdf)
Supplement: ERJ-01020-2013_Disclosures.pdf [file ERJ-01020-2013_Disclosures.pdf]

**C. van Weel** received, as head of department, unrestricted research grants for his research program from Bayer, NovoNordisk, Astra Zeneca, Boehringer Ingelheim, GlaxoSmithKline and Novartis, and unrestricted grants for the organisation of research conferences from the Dutch Dairy Foundation.

**T. Schermer** received fees or grants for his department used for research, education, equipment, salaries, *etc.* from NutsOhra Fund, GlaxoSmithKline, AstraZeneca and Boehringer Ingelheim.
